# Supplementary material for: Subcortical brain volumes, cortical thickness and cortical surface area in families genetically enriched for social anxiety disorder – A multiplex multigenerational neuroimaging study
Source: PubMed Central journal article supplement — eBioMedicine. 2018 Sep 25;36:410–28. doi: 10.1016/j.ebiom.2018.08.048 (PMC6197574; doi:10.1016/j.ebiom.2018.08.048), 2018-09-25

## a Subcortical ROIs - volumes

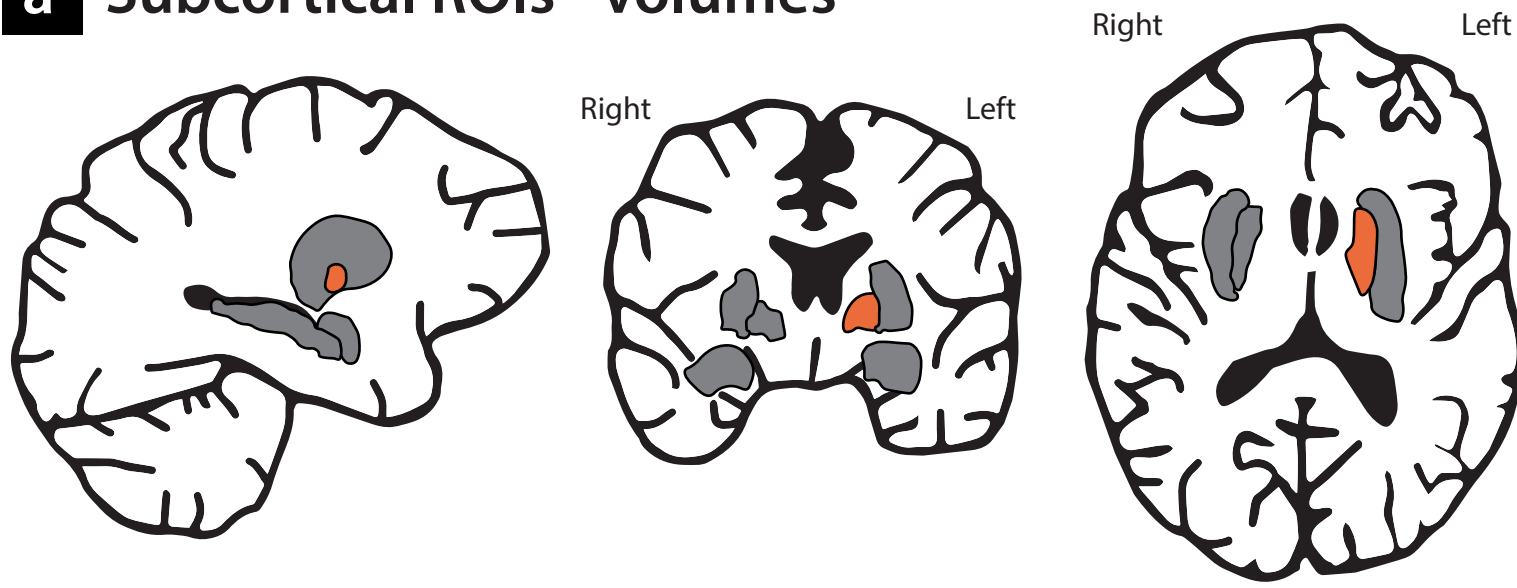

## Co-segregation with social anxiety within families

- Negative association, two significant measures
- Negative association, one significant measure
- Positive association, one significant measure
- Positive association, two significant measures
- No association
- No region of interest

## b Cortical ROIs - cortical thickness

Lateral view - right hemisphere

Lateral view - left hemisphere

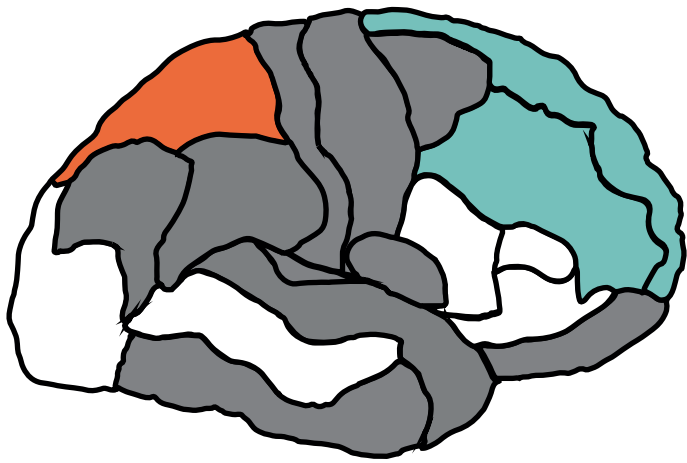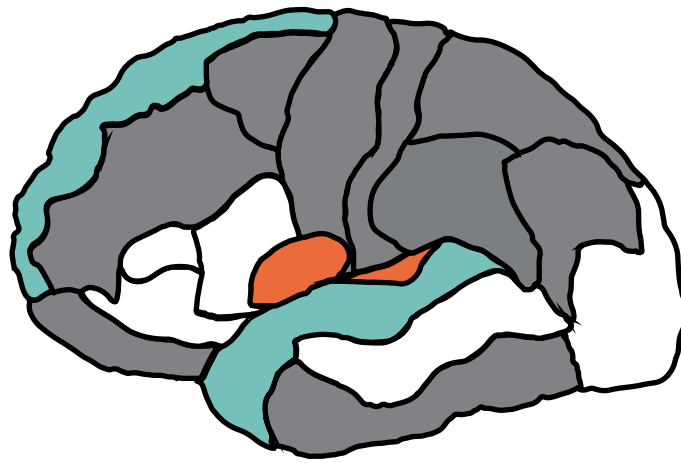

Medial view - right hemisphere

Medial view - left hemisphere

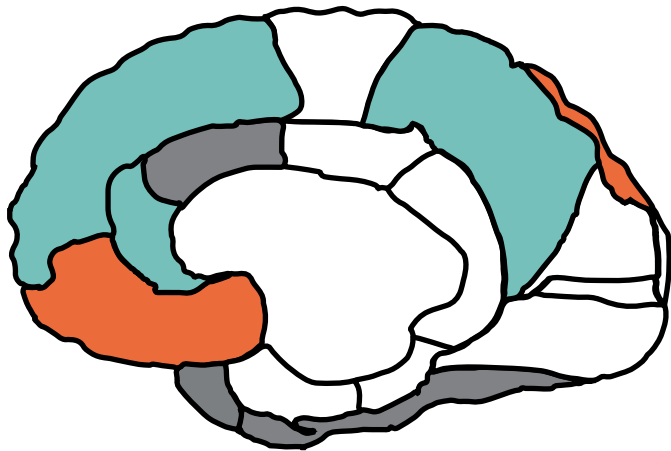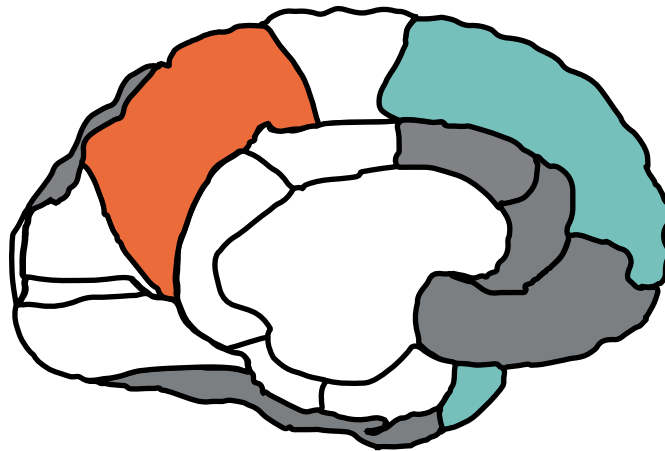

**Sensitivity analysis 1:**  
no participants with (comorbid) psychopathology other than (sub)clinical SAD

## c Cortical ROIs - cortical surface area

Lateral view - right hemisphere

Lateral view - left hemisphere

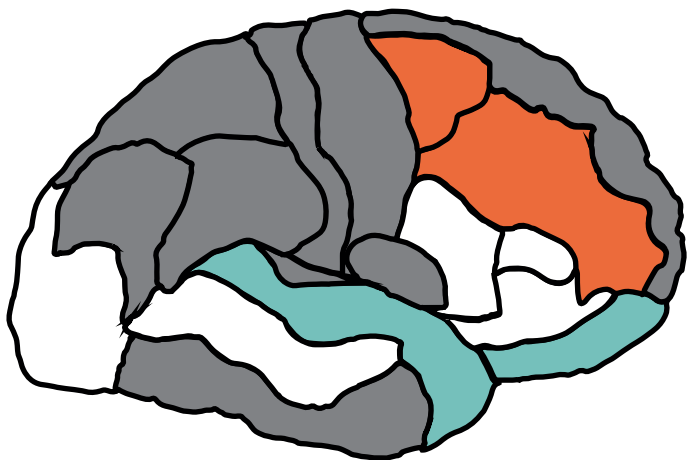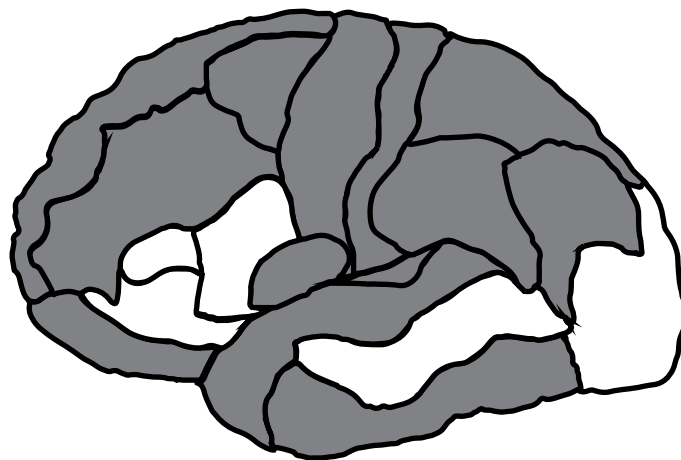

Medial view - right hemisphere

Medial view - left hemisphere

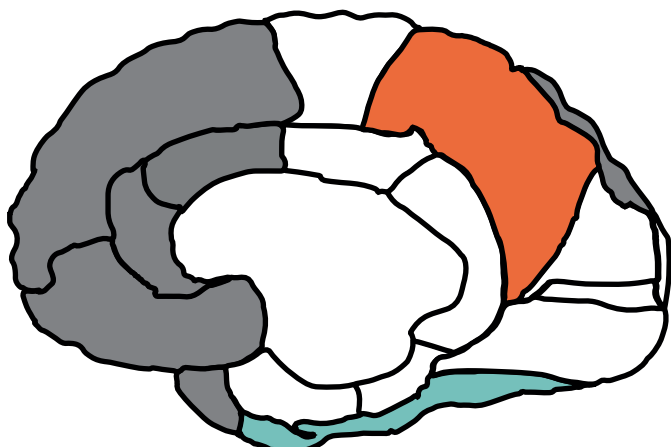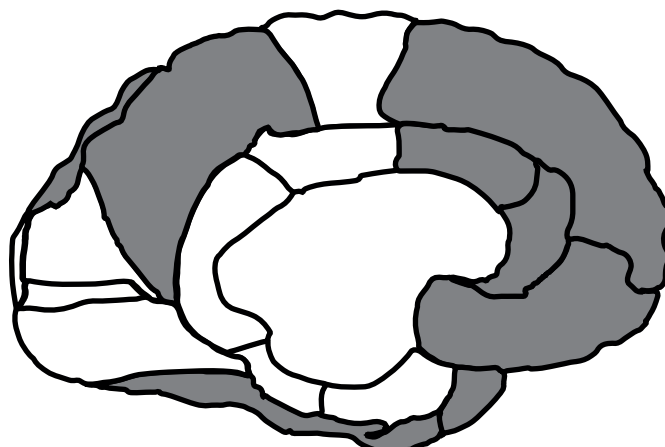

Supplement: mmc2.pdf [file mmc2.pdf]
