# Supplementary figures and images for: Subcortical brain volumes, cortical thickness and cortical surface area in families genetically enriched for social anxiety disorder – A multiplex multigenerational neuroimaging study
Source: PubMed Central journal article supplement — eBioMedicine. 2018 Sep 25;36:410–28. doi: 10.1016/j.ebiom.2018.08.048 (PMC6197574; doi:10.1016/j.ebiom.2018.08.048), 2018-09-25

### Right rostral middle frontal gyrus

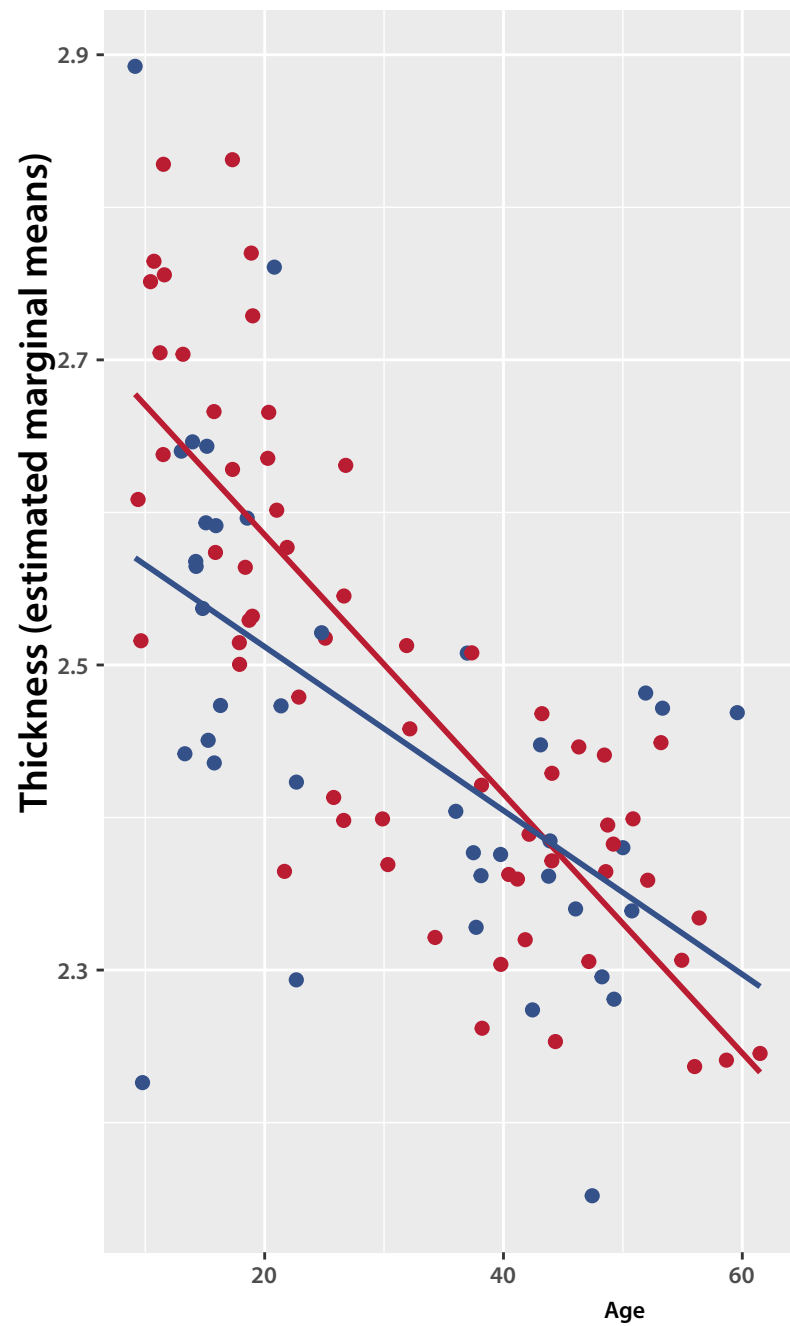

### Left supramarginal gyrus

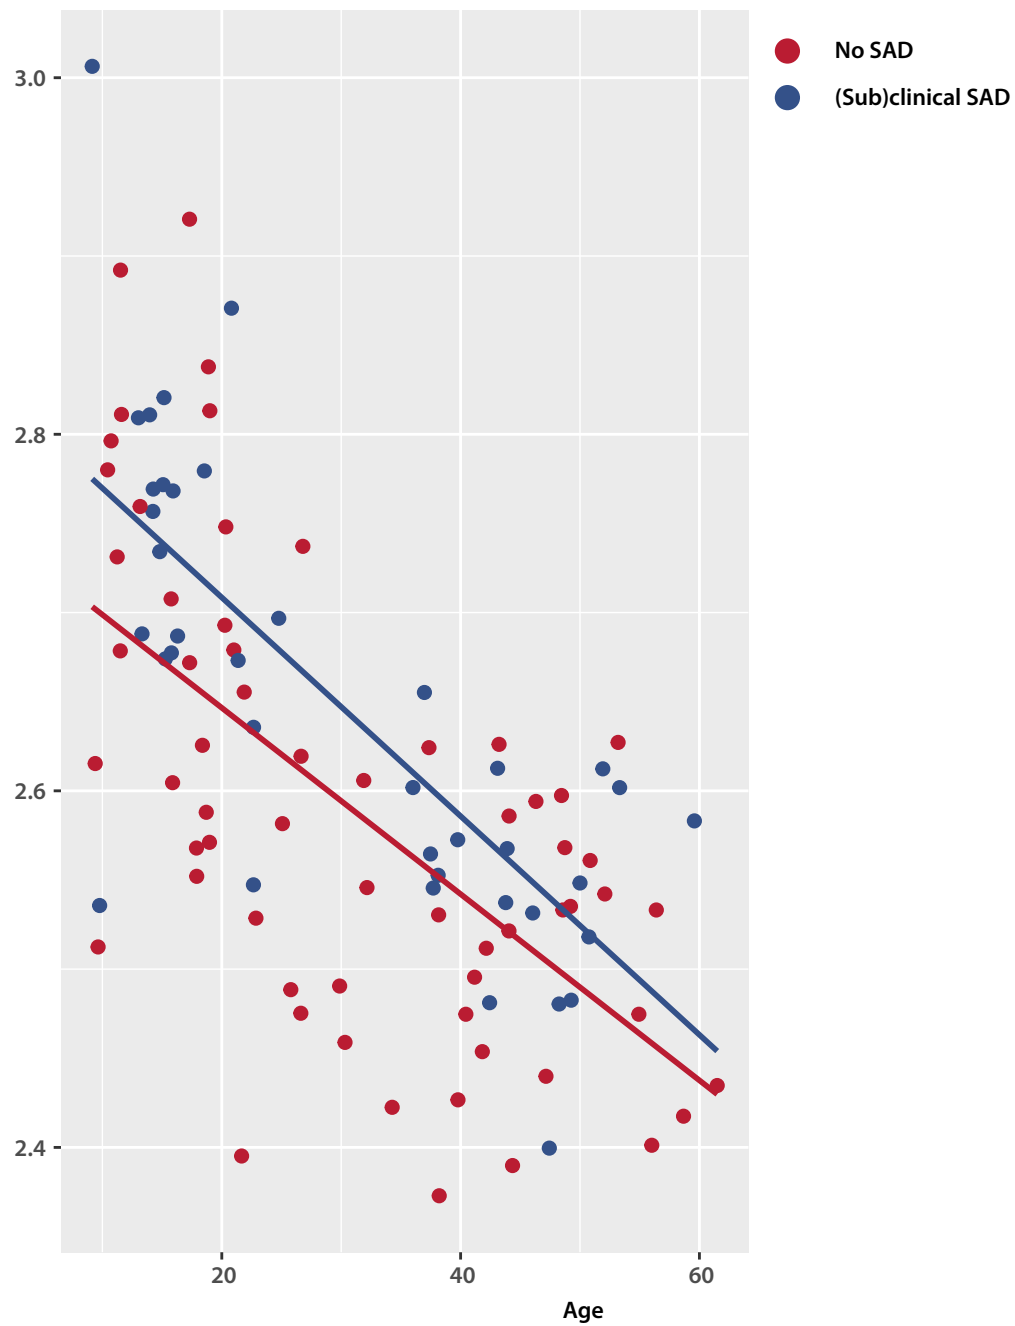

Supplement: mmc1.pdf [file mmc1.pdf]
